# Supplementary material for: Clarifying the Configuration of Pandamine by an Extensive Spectroscopic Reinvestigation of the Authentic 1964 Sample
Source: MDPI journal article supplement (doi:10.3390/metabo13040470), 2023-03-24

*Supplementary Materials*

# Clarifying the Configuration of Pandamine by an Extensive Spectroscopic Reinvestigation of the Authentic 1964 Sample

Pascal Retailleau <sup>1</sup>, Evodie Numbi Wa Ilunga <sup>2</sup>, Véronique Fontaine <sup>2</sup>, Jean-François Gallard <sup>1</sup>  
and Pierre Le Pogam <sup>3,\*</sup>

<sup>1</sup> Institut de Chimie des Substances Naturelles, CNRS, ICSN UPR 2301, Université Paris-Saclay, 91198 Gif-sur-Yvette, France; pascal.retailleau@cnrs.fr (P.R.); jean-francois.gallard@cnrs.fr (J.-F.G.)

<sup>2</sup> Microbiology, Bioorganic and Macromolecular Chemistry Unit, Université libre de Bruxelles (ULB), Faculty of Pharmacy, Campus Plaine, Boulevard du Triomphe, 1050 Bruxelles, Belgium; evodienumbi@gmail.com (E.N.W.I.); veronique.fontaine@ulb.be (V.F.)

<sup>3</sup> Équipe “Chimie des Substances Naturelles” BioCIS, CNRS, Université Paris-Saclay, 17 Avenue des Sciences, 91400 Orsay, France

\* Correspondence: pierre.le-pogam-alluard@universite-paris-saclay.fr

## TABLE OF CONTENTS

|                                                                                                                                                                             |
|-----------------------------------------------------------------------------------------------------------------------------------------------------------------------------|
| Figure S1. (+)-HRESIMS analysis of pandamine ( <b>1</b> ).                                                                                                                  |
| Figure S2. <sup>1</sup> H NMR (DMSO- <i>d</i> <sub>6</sub> , 500 MHz) spectrum of pandamine ( <b>1</b> ).                                                                   |
| Figure S3. <sup>13</sup> C NMR (DMSO- <i>d</i> <sub>6</sub> , 125 MHz) spectrum of pandamine ( <b>1</b> ).                                                                  |
| Figure S4. COSY (DMSO- <i>d</i> <sub>6</sub> , 500 MHz) spectrum of pandamine ( <b>1</b> ).                                                                                 |
| Figure S5. COSY-TOCSY (DMSO- <i>d</i> <sub>6</sub> , 500 MHz) spectrum of pandamine ( <b>1</b> ).                                                                           |
| Figure S6. Edited HSQC (DMSO- <i>d</i> <sub>6</sub> , 500/125 MHz) spectrum of pandamine ( <b>1</b> ).                                                                      |
| Figure S7. HSQC-TOCSY (DMSO- <i>d</i> <sub>6</sub> , 500/125 MHz) spectrum of pandamine ( <b>1</b> ).                                                                       |
| Figure S8. HMBC (DMSO- <i>d</i> <sub>6</sub> , 500/125 MHz) spectrum of pandamine ( <b>1</b> ).                                                                             |
| Figure S9. ROESY (DMSO- <i>d</i> <sub>6</sub> , 500 MHz) spectrum of pandamine ( <b>1</b> ).                                                                                |
| Figure S10. <sup>1</sup> H NMR (TFA- <i>d</i> , 500 MHz) spectrum of pandamine ( <b>1</b> ).                                                                                |
| Figure S11. <sup>13</sup> C NMR (TFA- <i>d</i> , 125 MHz) spectrum of pandamine ( <b>1</b> ).                                                                               |
| Figure S12. COSY (TFA- <i>d</i> , 500 MHz) spectrum of pandamine ( <b>1</b> ).                                                                                              |
| Figure S13. (A) Edited HSQC (TFA- <i>d</i> , 500/125 MHz) spectrum of pandamine ( <b>1</b> ),<br>(B) HMBC (TFA- <i>d</i> , 500/125 MHz) spectrum of pandamine ( <b>1</b> ). |
| Figure S14. ROESY (TFA- <i>d</i> , 500 MHz) spectrum of pandamine ( <b>1</b> ).                                                                                             |
| Figure S15. X-ray crystallography related data                                                                                                                              |

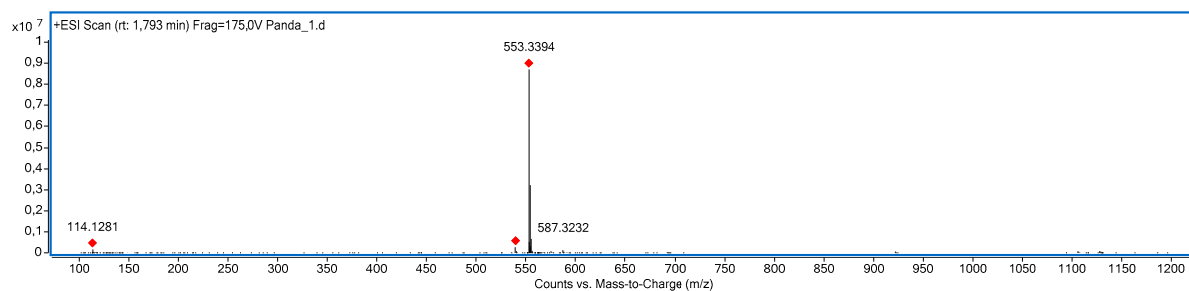

Figure S1. (+)-HRESIMS analysis of pandamine (1).

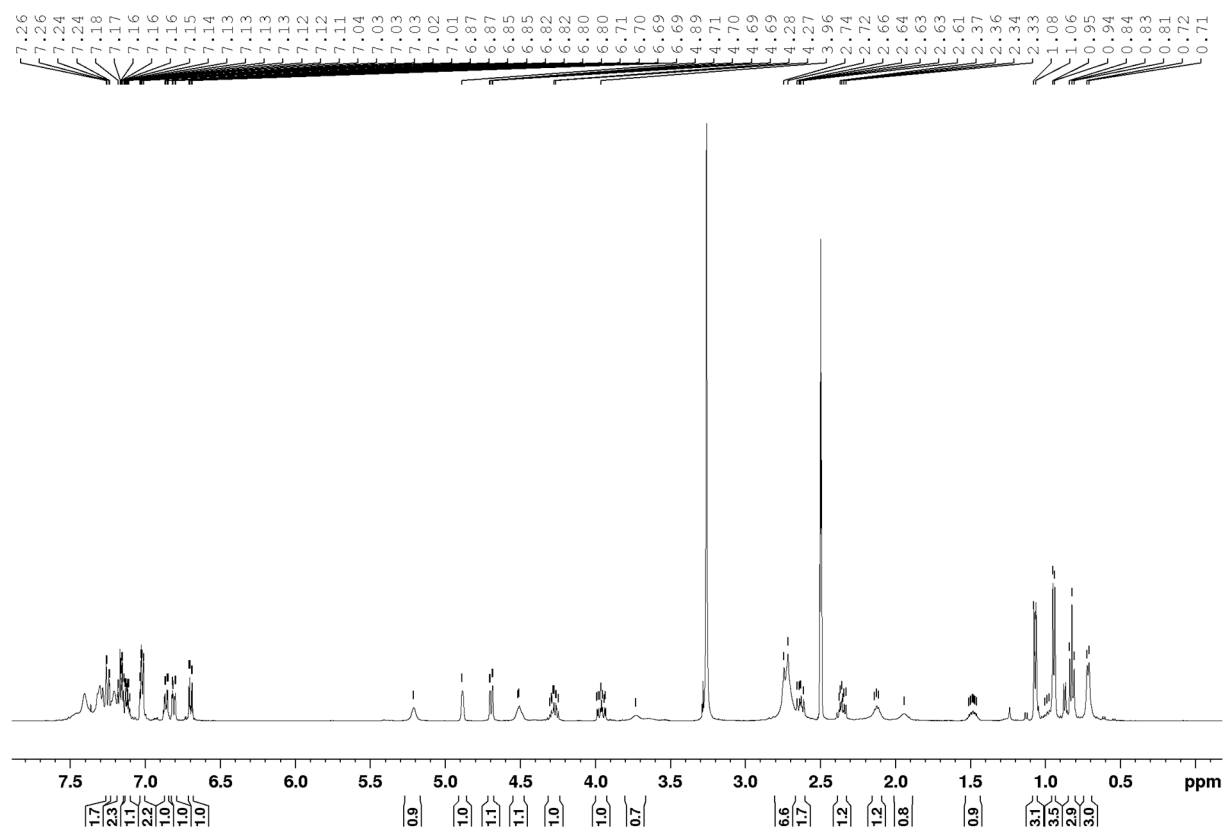

Figure S2. <sup>1</sup>H NMR (DMSO-*d*<sub>6</sub>, 500 MHz) spectrum of pandamine (1).

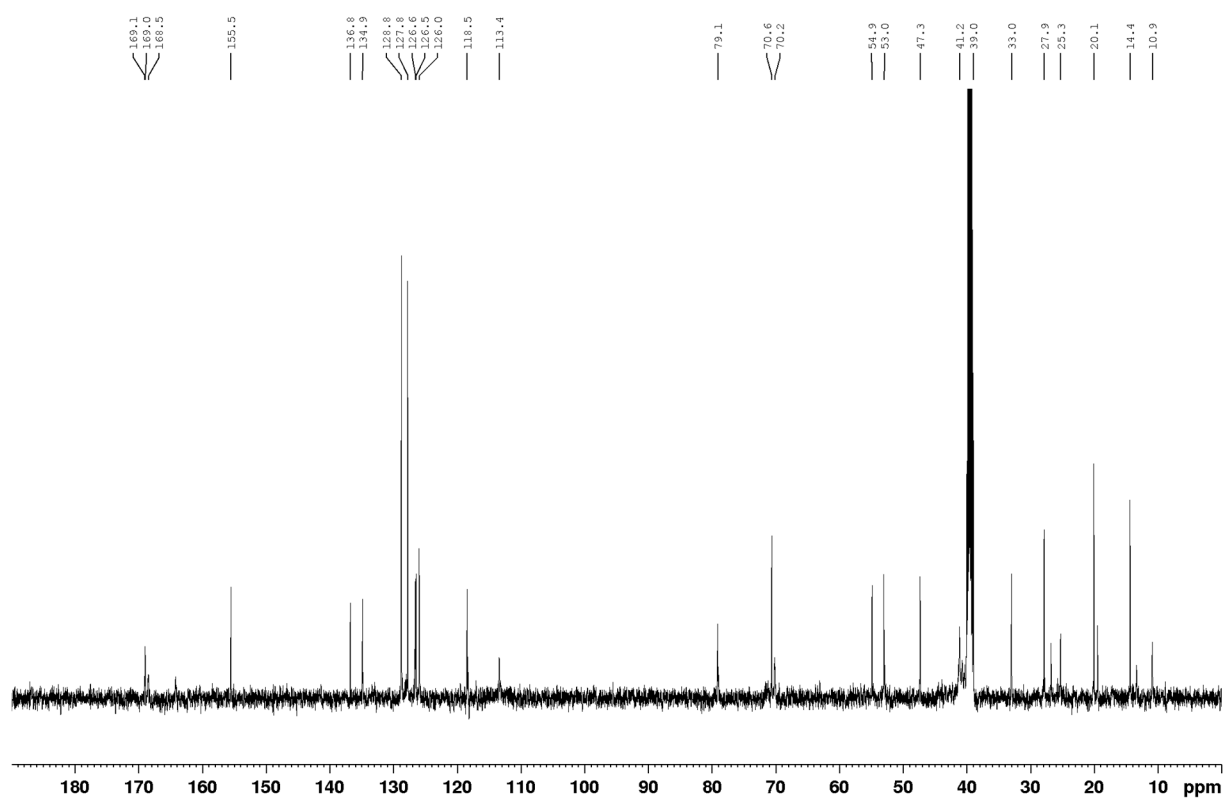

Figure S3.  $^{13}\text{C}$  NMR ( $\text{DMSO-}d_6$ , 125 MHz) spectrum of pandamine (1).

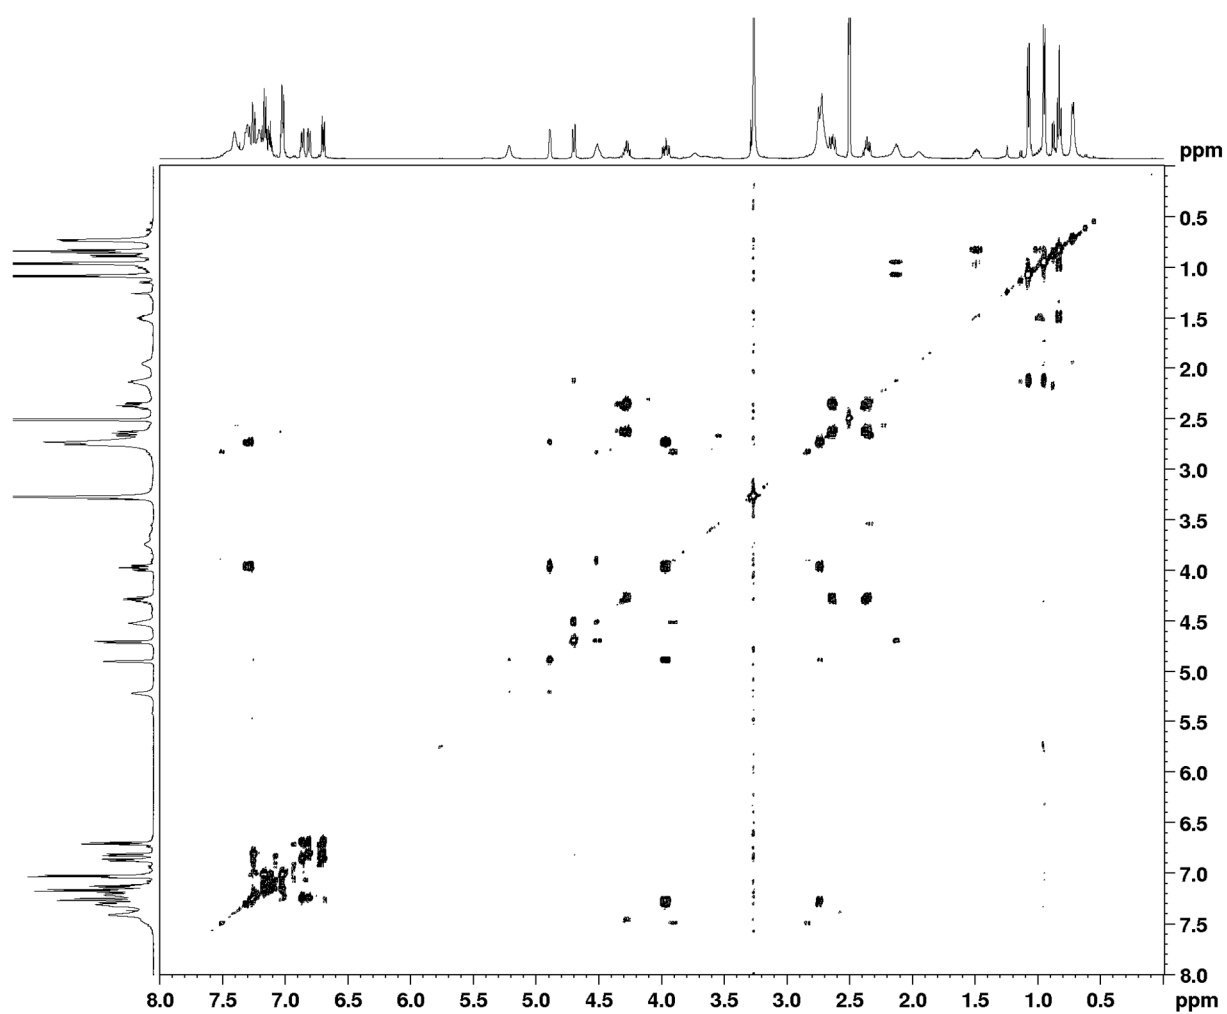

Figure S4. COSY (DMSO-*d*<sub>6</sub>, 500 MHz) spectrum of pandamine (1).

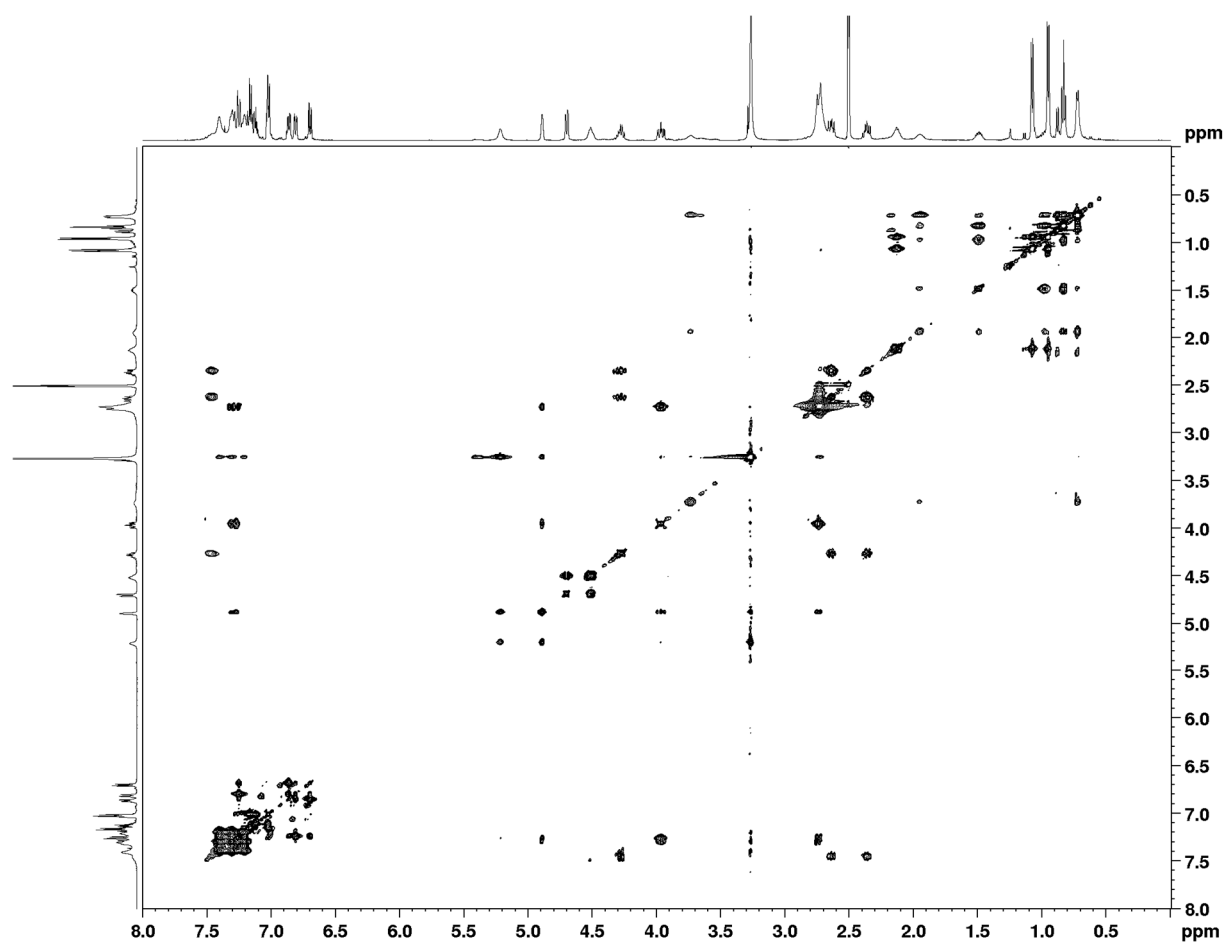

Figure S5. COSY-TOCSY (DMSO- $d_6$ , 500 MHz) spectrum of pandamine (1).

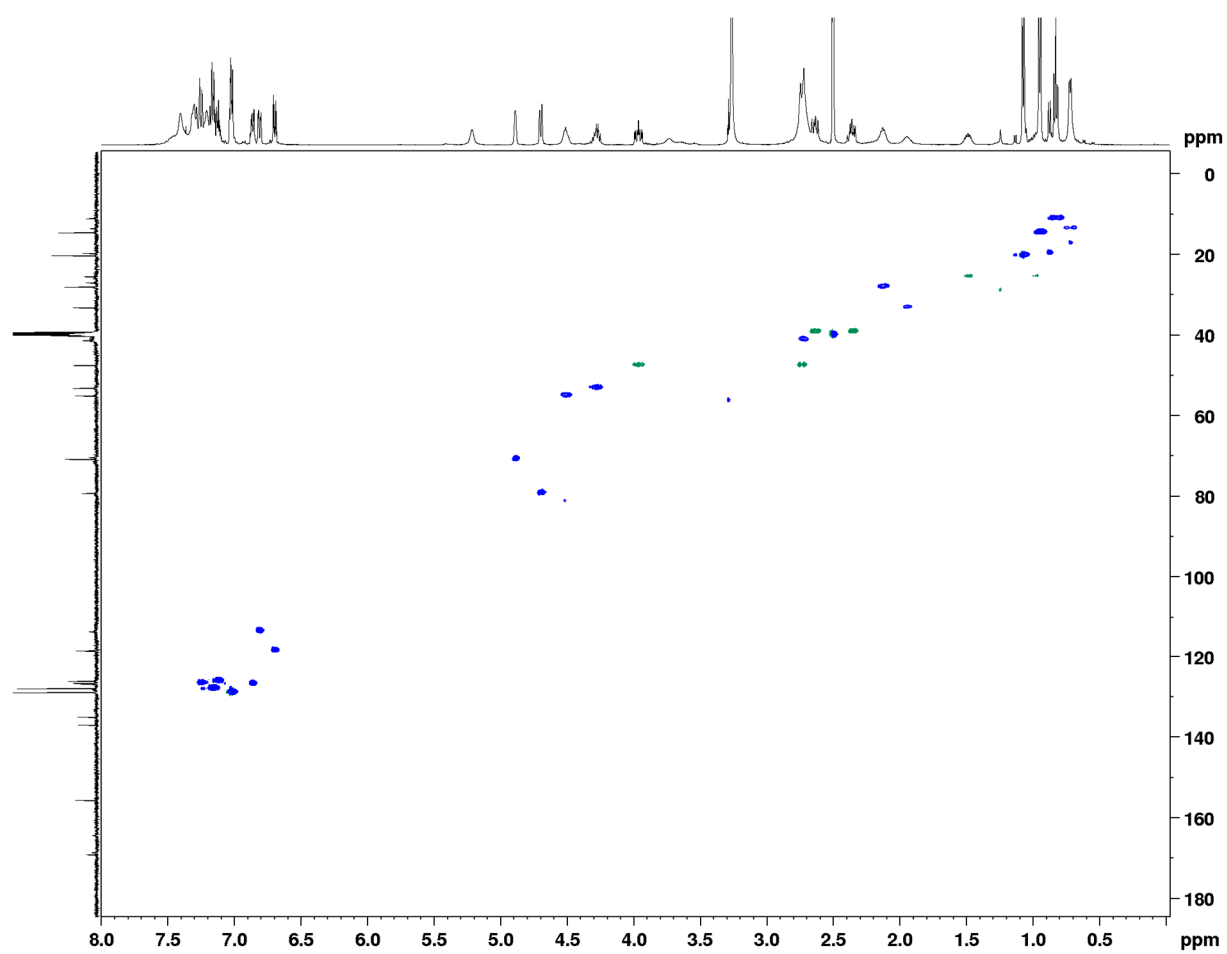

Figure S6. Edited HSQC (DMSO-*d*<sub>6</sub>, 500/125 MHz) spectrum of pandamine (1).

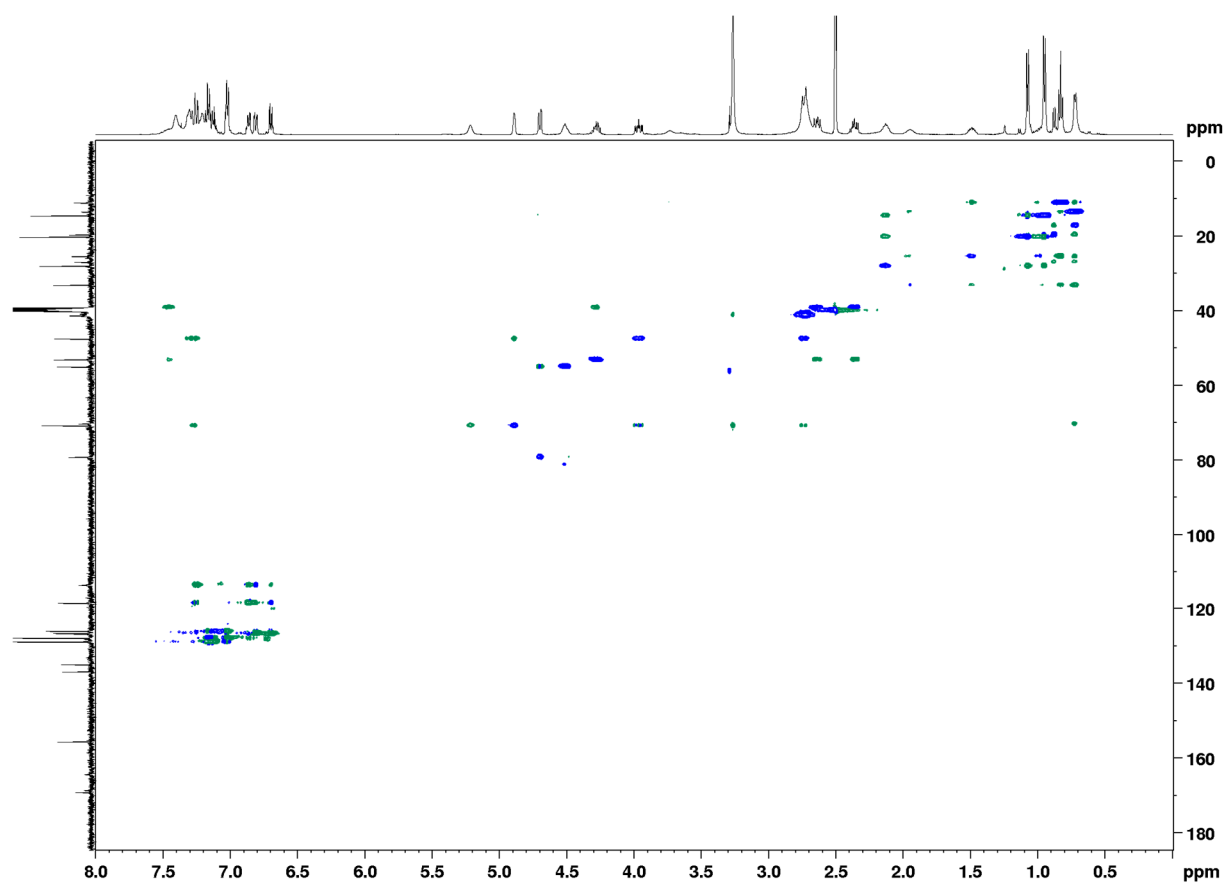

Figure S7. HSQC-TOCSY (DMSO-*d*<sub>6</sub>, 500/125 MHz) spectrum of pandamine (1).



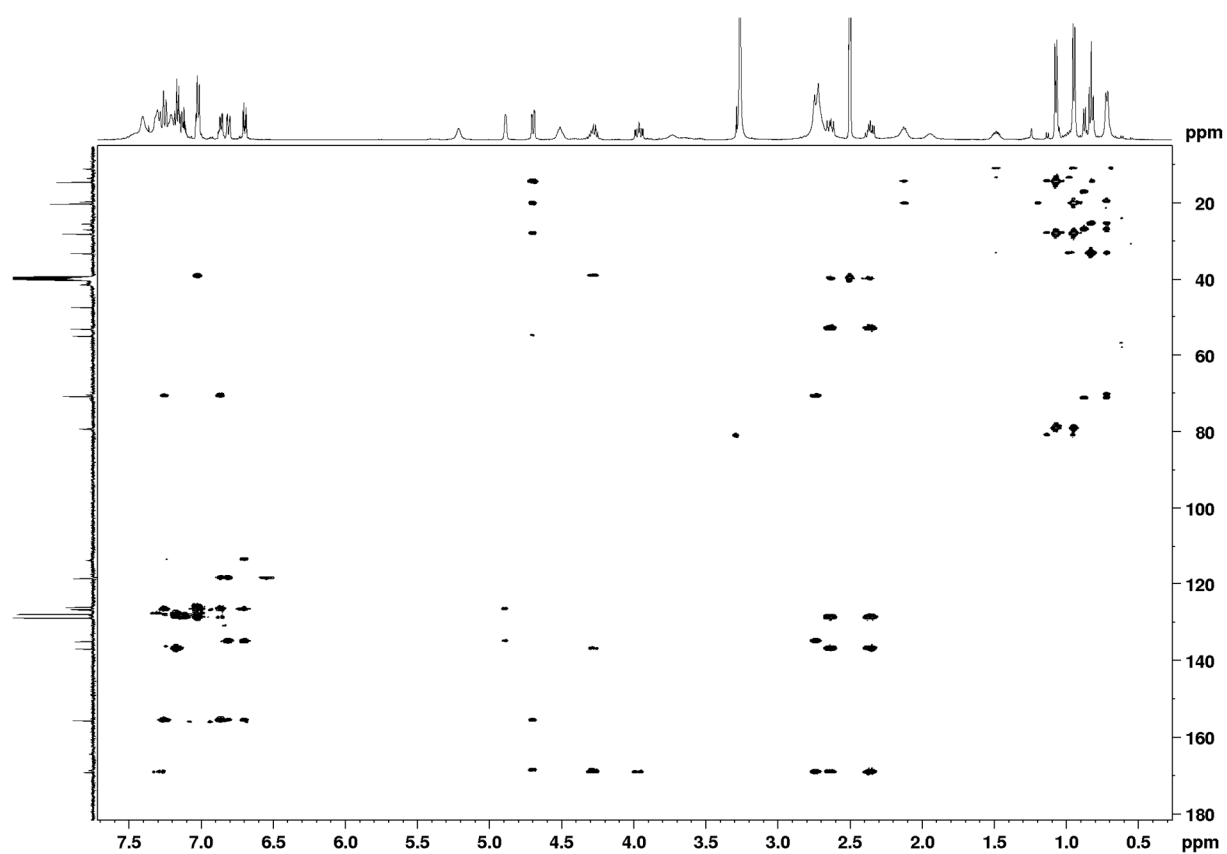

Figure S8. HMBC (DMSO-*d*<sub>6</sub>, 500/125 MHz) spectrum of pandamine (1).

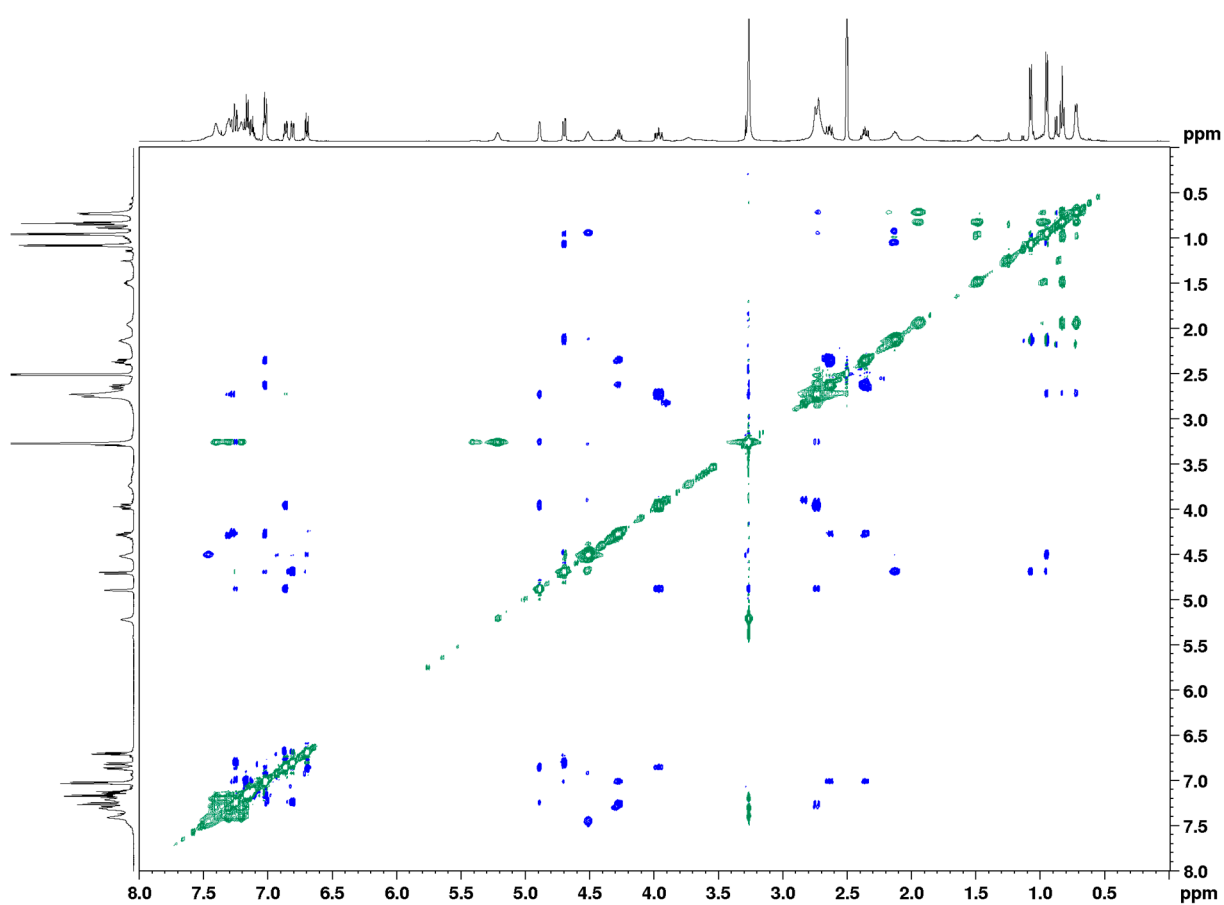

Figure S9. ROESY (DMSO-*d*<sub>6</sub>, 500 MHz) spectrum of pandamine (1).

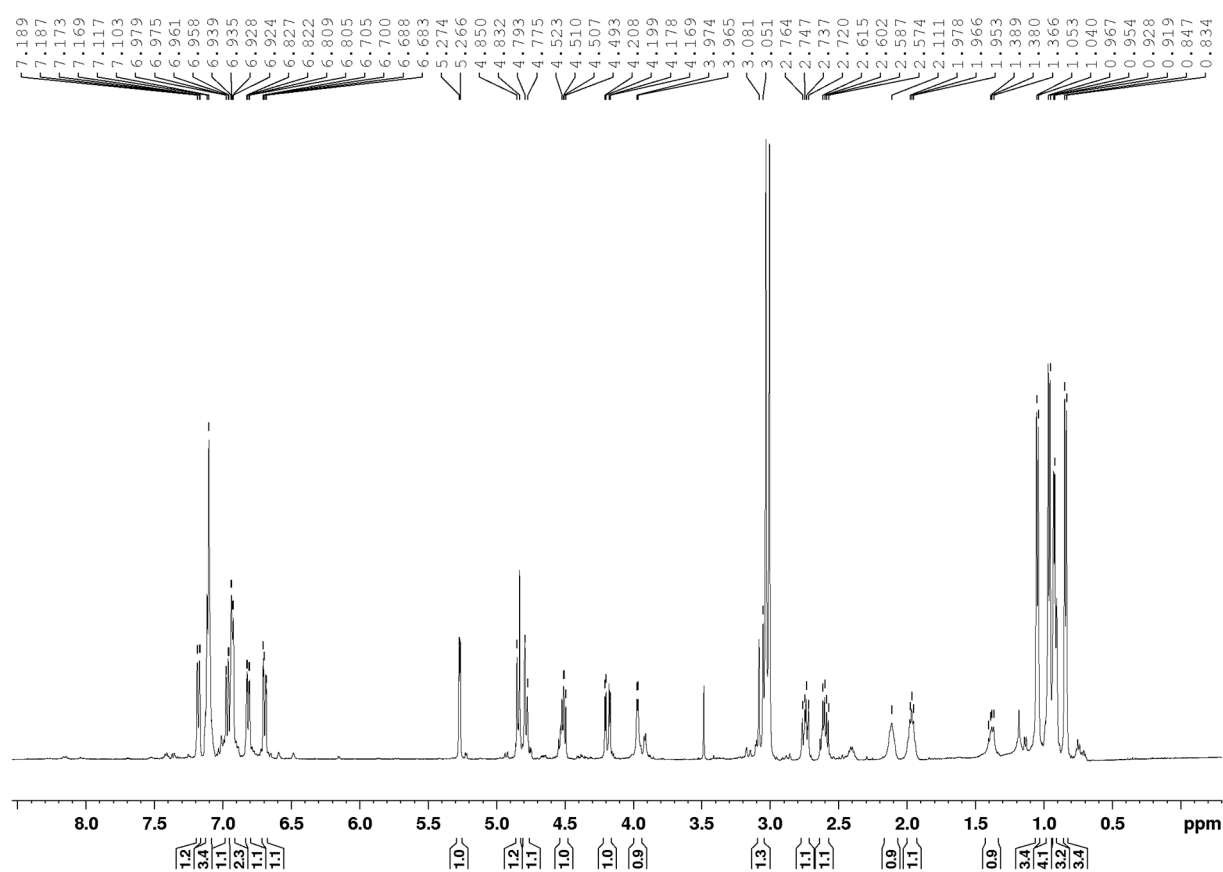

Figure S10.  $^1\text{H}$  NMR ( $\text{TFA-d}$ , 500 MHz) spectrum of pandamine (1).

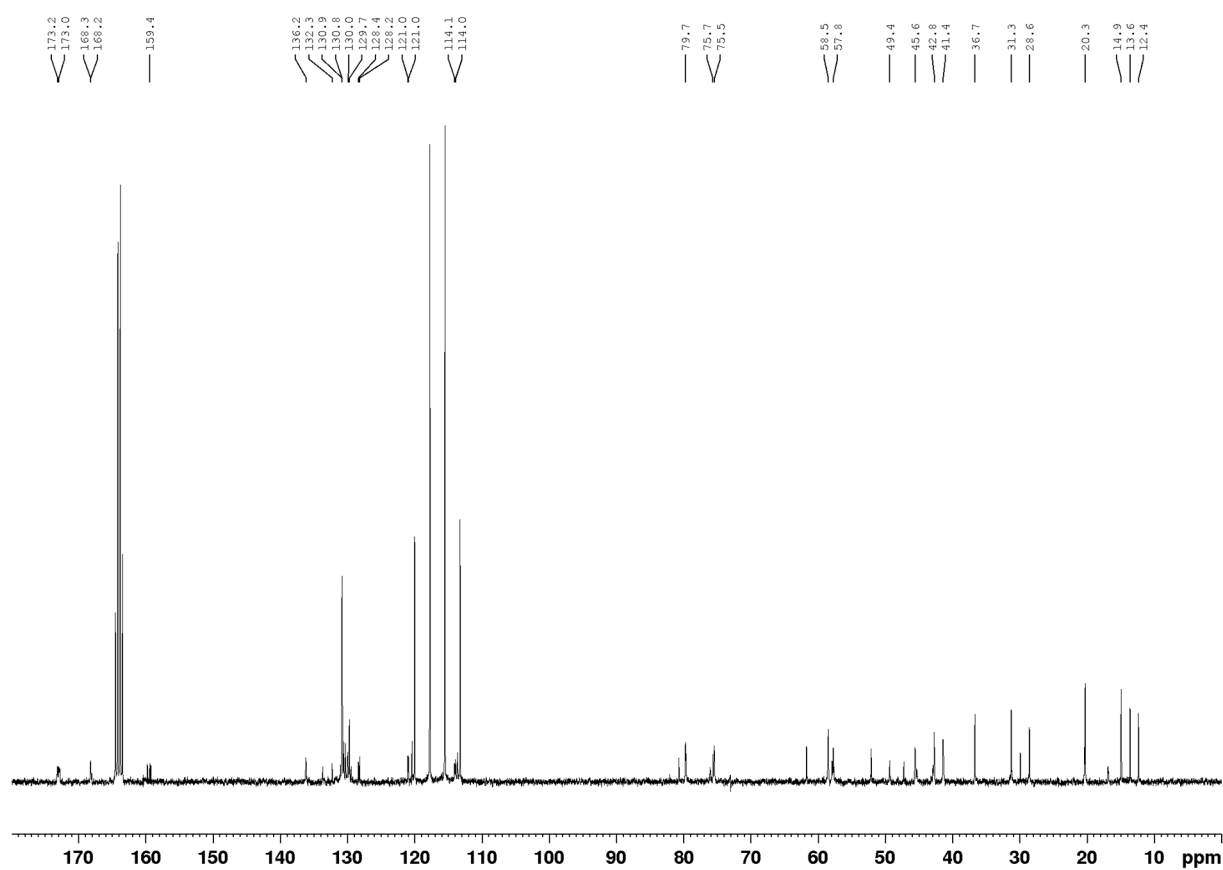

Figure S11.  $^{13}\text{C}$  NMR ( $\text{TFA-}d_4$ , 125 MHz) spectrum of pandamine (1).

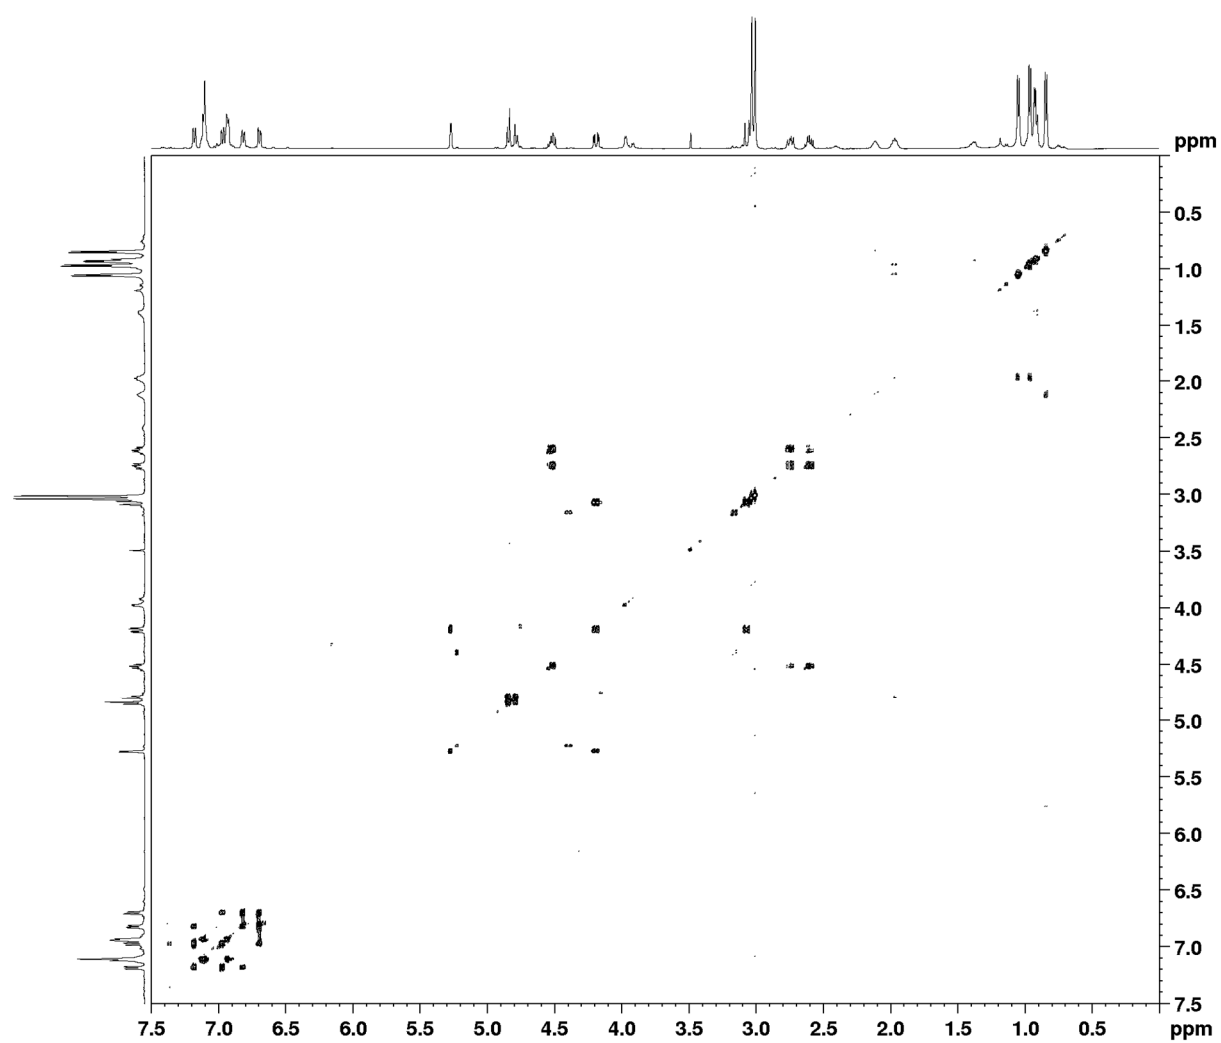

Figure S12. COSY NMR (TFA-*d*, 500 MHz) spectrum of pandamine (1).

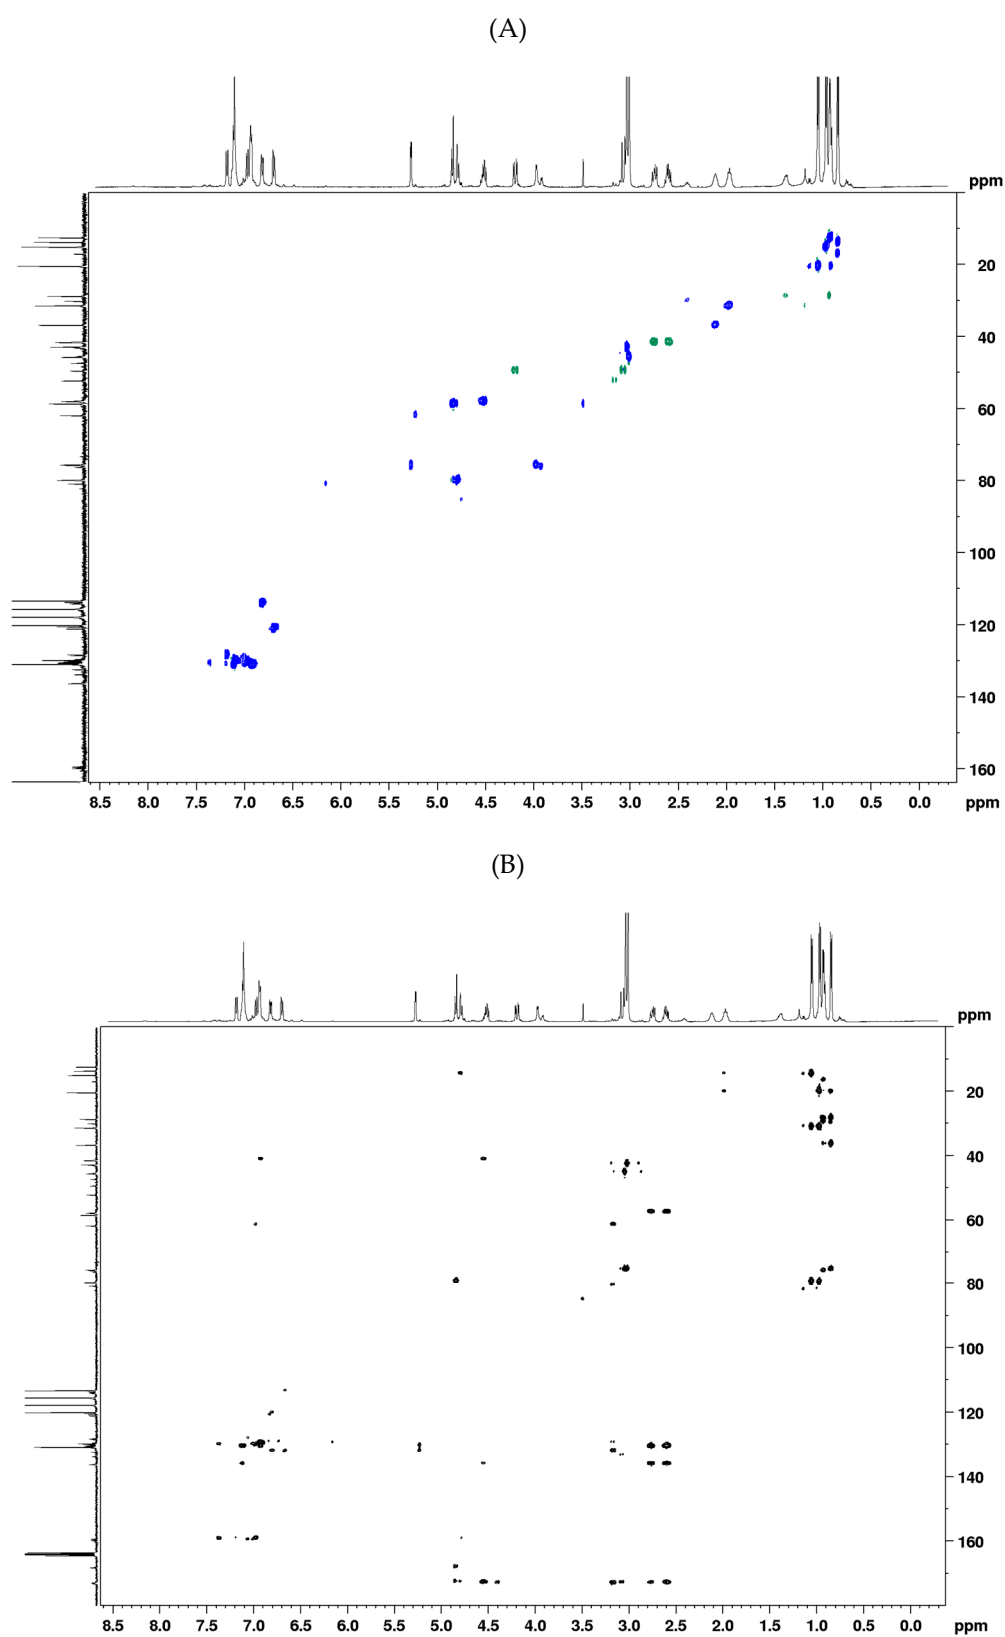

**Figure S13.** (A) Edited HSQC (TFA-*d*, 500/125 MHz) spectrum of pandamine (**1**), (B) HMBC (TFA-*d*, 500/125 MHz) spectrum of pandamine (**1**).

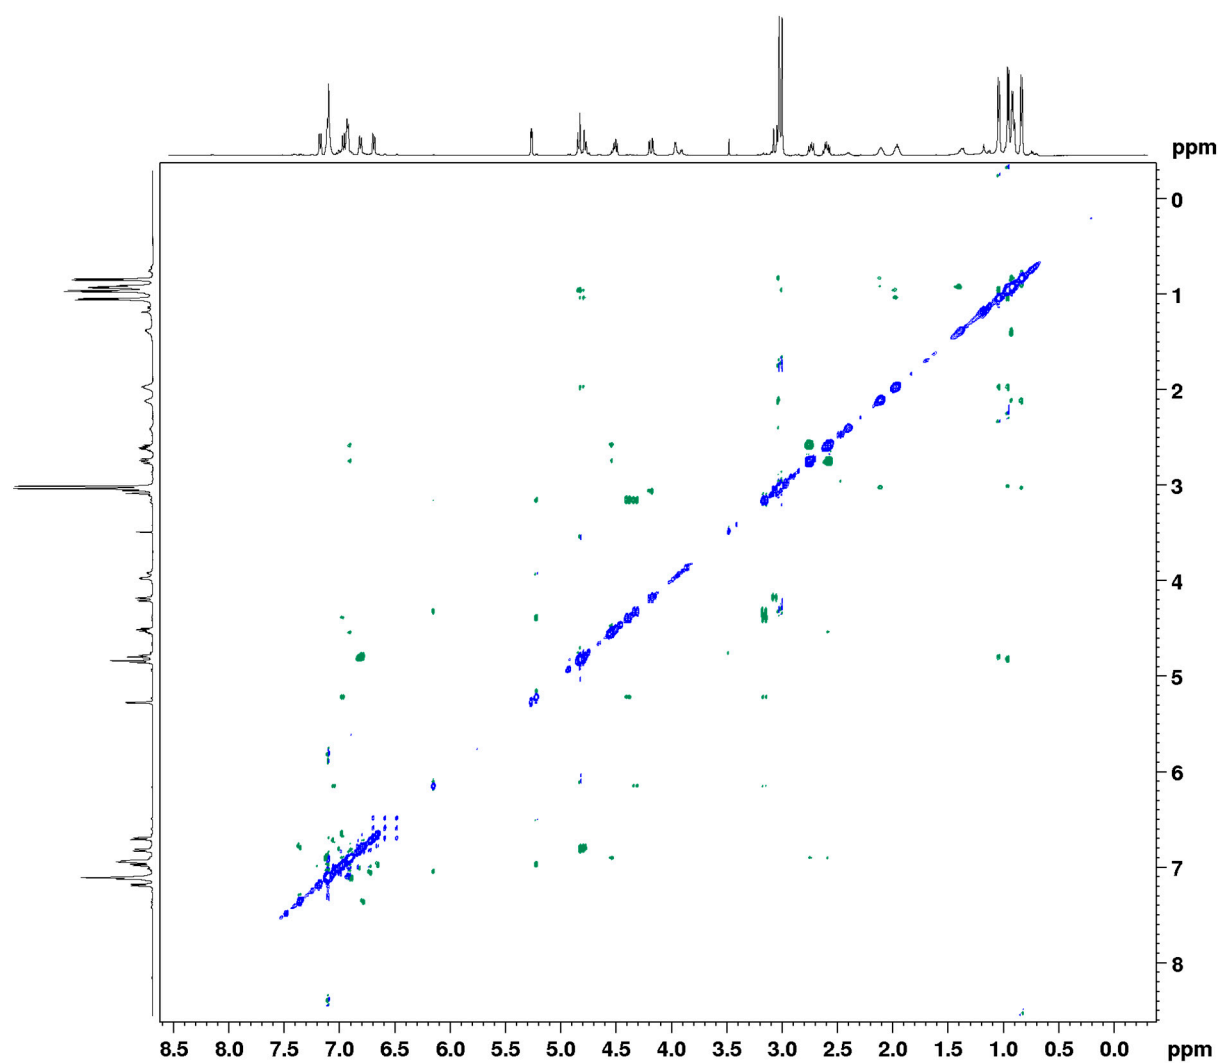

Figure S14. ROESY (TFA-*d*, 500) spectrum of pandamine (1).

(A)

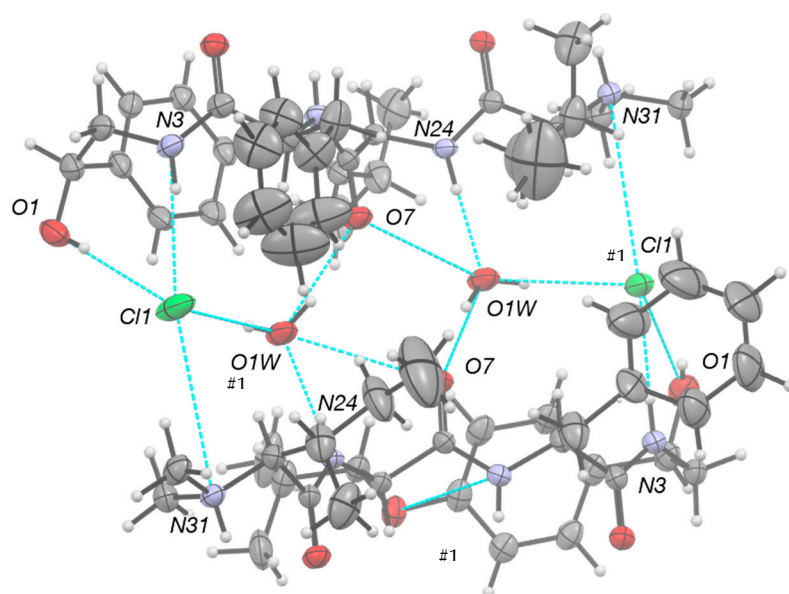

(B)

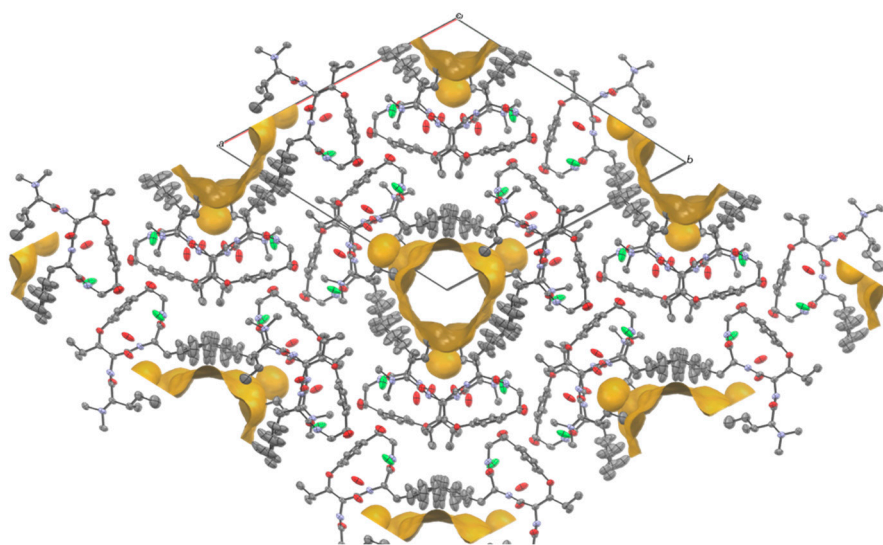

(C)



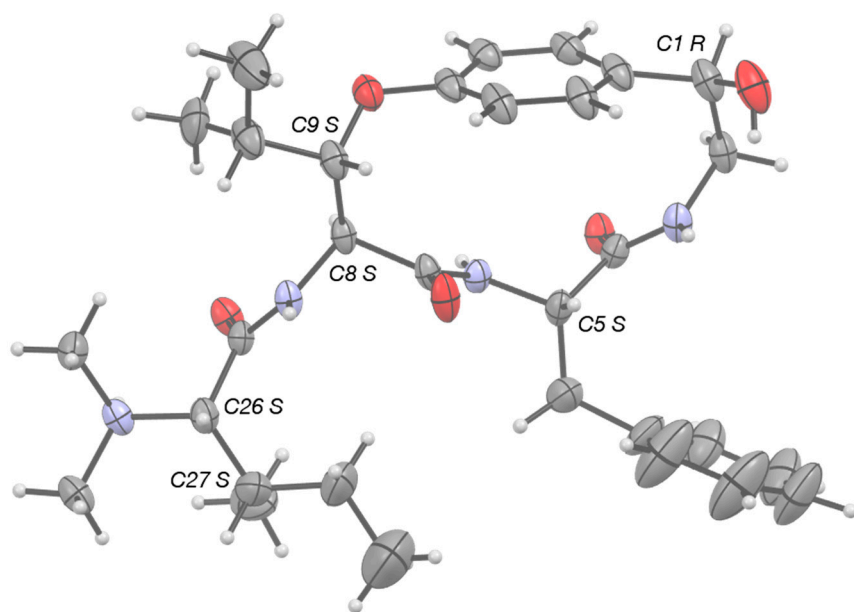

(D)

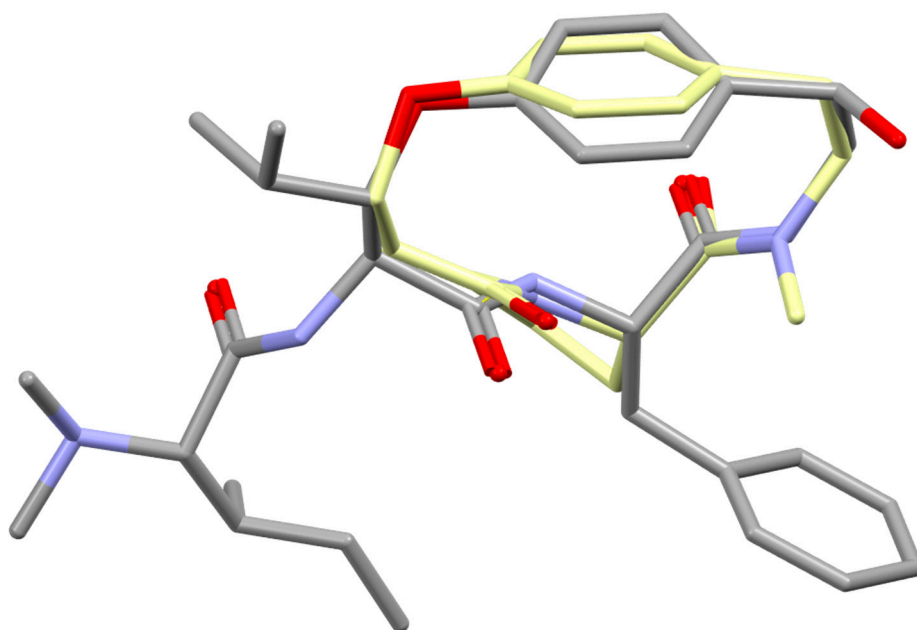

**Figure S15** (A) Partial view of the unit cell of **1** showing the head-to-tail dimer indirectly H-bonded *via* two waters and two chlorine anions (symmetry transformation used to generate the pandamine molecule in the bottom and the water and chlorine marked by #1 y, x, 1-z). (B) Partial view of the crystal **1** packing down the *c* axis. The solvent-accessible voids are delineated by yellow surfaces. (C) Ortep view of the pandamine cationic form with the labelling of chiral centers (Displacement ellipsoids are drawn at the 50% probability level). Only the major conformer of the phenyl group is shown for clarity. (D) Overlay of Pandamine over the macrocycle of CSD RefCode BUCKOZ (carbon atoms in yellow) (the RMSD of the 12 common atoms is 0.252Å).

**Table S1** Crystal data and structure refinement for pandamine (1).

| Identification code               | pandamine (1)                                                                                                                 |           |
|-----------------------------------|-------------------------------------------------------------------------------------------------------------------------------|-----------|
| Empirical formula                 | [C <sub>31</sub> H <sub>45</sub> N <sub>4</sub> O <sub>5</sub> ] <sup>+</sup> , Cl <sup>-</sup> , H <sub>2</sub> O [+solvent] |           |
| Formula weight                    | 607.1                                                                                                                         |           |
| Temperature                       | 123.0 (2) K                                                                                                                   |           |
| Wavelength                        | 0.71073 Å                                                                                                                     |           |
| Crystal system                    | Trigonal                                                                                                                      |           |
| Space group                       | P3 <sub>2</sub> 21                                                                                                            |           |
| Unit cell dimensions              | a = 23.0122(13) Å                                                                                                             | α = 90°.  |
|                                   | b = 23.0122(13) Å                                                                                                             | β = 90°.  |
|                                   | c = 11.8273(6) Å                                                                                                              | γ = 120°. |
| Volume                            | 5424.2(7) Å <sup>3</sup>                                                                                                      |           |
| Z                                 | 6                                                                                                                             |           |
| Density (calculated)              | 1.115 Mg/m <sup>3</sup>                                                                                                       |           |
| Absorption coefficient            | 0.148 mm <sup>-1</sup>                                                                                                        |           |
| F(000)                            | 1956                                                                                                                          |           |
| Crystal size                      | 0.22 x 0.05 x 0.05 mm <sup>3</sup>                                                                                            |           |
| θ range for data collection       | 2.470 to 27.101°.                                                                                                             |           |
| Index ranges                      | -29 ≤ h ≤ 28, -29 ≤ k ≤ 29, -15 ≤ l ≤ 14                                                                                      |           |
| Reflections collected             | 47767                                                                                                                         |           |
| Independent reflections           | 7989 [R(int) = 0.0501]                                                                                                        |           |
| Completeness to θ = 25.242°       | 99.7 %                                                                                                                        |           |
| Absorption correction             | Semi-empirical from equivalents & Gaussian                                                                                    |           |
| Max. and min. transmission        | 1.000 and 0.854                                                                                                               |           |
| Refinement method                 | Full-matrix least-squares on F <sup>2</sup>                                                                                   |           |
| Data / restraints / parameters    | 7983/ 507 / 505                                                                                                               |           |
| Goodness-of-fit on F <sup>2</sup> | 1.047                                                                                                                         |           |
| Final R indices [I > 2σ(I)]       | R1 = 0.0445, wR2 = 0.1149                                                                                                     |           |
| R indices (all data)              | R1 = 0.0525, wR2 = 0.1195                                                                                                     |           |
| Absolute structure parameter      | -0.02.(2) <sup>§</sup>                                                                                                        |           |
| Largest diff. peak and hole       | 0.268 and -0.238 e.Å <sup>-3</sup>                                                                                            |           |
| CCDC deposit number               | 2235441                                                                                                                       |           |

<sup>§</sup>Flack x determined using 2859 quotients [(I<sup>+</sup>)-(I<sup>-</sup>)]/[(I<sup>+</sup>)+(I<sup>-</sup>)].

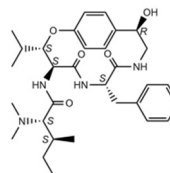

Supplement: s1 [file s1]
